# Supplementary material
Source: ML conference proceedings conference paper supplement (https://proceedings.mlr.press/v130/moseley21a.html)
Supplement: Supplementary file 2 [file moseley21a-supp.zip]

Archive with 20 entries (18 files):
- 1042-supp/
- 1042-supp/1042-Appendix.pdf
- 1042-supp/1042-Permission.pdf
- 1042-supp/code/
- 1042-supp/code/avlk_validation_helpers.py
- 1042-supp/code/data_gather_ny.py
- 1042-supp/code/data_gather_seizure.py
- 1042-supp/code/data_preprocess.py
- 1042-supp/code/data_preprocess_2.py
- 1042-supp/code/data_preprocess_high_dimensional.py
- 1042-supp/code/distance_counts.py
- 1042-supp/code/dist_gather.py
- 1042-supp/code/lsh_avlk_with_heaps.py
- 1042-supp/code/lsh_MST_second_implementation_constant.py
- 1042-supp/code/MST_test_seizure.py
- 1042-supp/code/README.txt
- 1042-supp/code/test _ny.py
- 1042-supp/code/test_avlk_map_metric.py
- 1042-supp/code/test_avlk_with_jl_new_test.py
- 1042-supp/code/test_eps_ny.py
